# Supplementary material for: Relationship between Urinary Level of Phytate and Valvular Calcification in an Elderly Population: A Cross-Sectional Study
Source: PubMed Central journal article supplement (PMC4554994; doi:10.1371/journal.pone.0136560), 2015-08-31
Supplement: pone.0136560.s001.pdf [file pone.0136560.s001.pdf]

## Dataset. Relationship between Urinary Level of Phytate and Valvular Calcification in an Elderly Population: a Cross-Sectional Study

| Subject | BilirubinT | Calcium | Chloride | Cholesterol Total | Creatinine | Eosinophiles | Fibrinogen | Phosphorous | GGT | Glycemia | Haemoglobine | Homocysteine | HDL | Hematies (10^6) | Haematocrit | LDL-C | Leukocytes | Lymphocytes |
|---------|------------|---------|----------|-------------------|------------|--------------|------------|-------------|-----|----------|--------------|--------------|-----|-----------------|-------------|-------|------------|-------------|
| 1       | 0          | 10      | 95       | 150               | 1          | 3            | 503        | 3           | 277 | 130      | 11           | 16           | 64  | 3               | 34          | 67    | 5          | 26          |
| 2       | 0          | 9       | 98       | 120               | 4          | 1            | 510        | 6           | 130 | 91       | 9            | 19           | 42  | 3               | 28          | 53    | 7          | 22          |
| 3       | 1          | 9       | 99       | 155               | 0          | 1            | 305        | 4           | 30  | 95       | 13           | 5            | 61  | 4               | 37          | 79    | 8          | 15          |
| 4       | 0          | 9       | 100      | 206               | 0          | 1            | 365        | 3           | 24  | 112      | 14           | 8            | 58  | 4               | 43          | 130   | 7          | 34          |
| 5       | 0          | 10      | 98       | 269               | 0          | 1            | 450        | 3           | 28  | 120      | 14           | 6            | 59  | 4               | 42          | 179   | 8          | 38          |
| 6       | 1          | 9       | 102      | 162               | 0          | 0            | 433        | 3           | 23  | 131      | 15           | 8            | 65  | 4               | 43          | 83    | 6          | 17          |
| 7       | 1          | 9       | 94       | 169               | 0          | 3            | 362        | 4           | 101 | 143      | 15           | 9            | 45  | 5               | 47          | 101   | 7          | 21          |
| 8       | 0          | 8       | 92       | 118               | 1          | 3            | 660        | 3           | 13  | 149      | 9            | 13           | 50  | 3               | 29          | 34    | 9          | 16          |
| 9       | 0          | 9       | 107      | 200               | 2          | 8            | 385        | 4           | 17  | 93       | 10           | 9            | 40  | 3               | 33          | 137   | 6          | 25          |
| 10      | 0          | 8       | 99       | 163               | 0          | 3            | 532        | 4           | 45  | 94       | 11           | 4            | 61  | 3               | 34          | 88    | 3          | 21          |
| 11      | 0          | 9       | 95       | 200               | 0          | 5            | 356        | 3           | 18  | 134      | 13           | 9            | 68  | 4               | 39          | 99    | 5          | 32          |
| 12      | 0          | 9       | 110      | 125               | 2          | 2            | 434        | 3           | 22  | 94       | 10           | 10           | 23  | 3               | 30          | 74    | 7          | 16          |
| 13      | 0          | 8       | 99       | 166               | 0          | 2            | 263        | 4           | 21  | 110      | 13           | 10           | 71  | 4               | 41          | 82    | 6          | 33          |
| 14      | 0          | 9       | 101      | 176               | 1          | 2            | 313        | 4           | 30  | 101      | 14           | 12           | 42  | 5               | 40          | 106   | 6          | 24          |
| 15      | 0          | 8       | 99       | 199               | 0          | 2            | 372        | 4           | 15  | 155      | 12           | 4            | 69  | 4               | 35          | 102   | 6          | 33          |
| 16      | 0          | 9       | 109      | 213               | 2          | 4            | 522        | 1           | 10  | 114      | 11           | 6            | 46  | 3               | 34          | 119   | 5          | 24          |
| 17      | 0          | 8       | 98       | 134               | 1          | 0            | 440        | 3           | 65  | 76       | 11           | 17           | 58  | 4               | 37          | 62    | 9          | 13          |
| 18      | 0          | 11      | 95       | 219               | 1          | 1            | 461        | 3           | 109 | 125      | 11           | 28           | 44  | 4               | 35          | 119   | 6          | 18          |
| 19      | 0          | 9       | 103      | 201               | 1          | 1            | 512        | 3           | 15  | 109      | 10           | 11           | 41  | 3               | 32          | 137   | 3          | 36          |
| 20      | 0          | 10      | 101      | 165               | 1          | 1            | 365        | 4           | 15  | 109      | 13           | 30           | 62  | 4               | 40          | 80    | 7          | 16          |
| 21      | 0          | 9       | 99       | 156               | 0          | 4            | 494        | 3           | 157 | 182      | 14           | 8            | 48  | 4               | 42          | 81    | 8          | 29          |
| 22      | 0          | 9       | 105      | 242               | 0          | 1            | 366        | 4           | 33  | 122      | 12           | 5            | 53  | 4               | 36          | 156   | 6          | 35          |
| 23      | 0          | 10      | 96       | 144               | 1          | 3            | 382        | 3           | 14  | 156      | 15           | 7            | 43  | 5               | 45          | 80    | 6          | 40          |
| 24      | 0          | 9       | 99       | 163               | 4          | 2            | 390        | 5           | 22  | 100      | 12           | 35           | 52  | 4               | 39          | 79    | 14         | 56          |
| 25      | 0          | 9       | 106      | 241               | 0          | 2            | 266        | 3           | 20  | 90       | 13           | 8            | 44  | 4               | 40          | 152   | 5          | 33          |
| 26      | 0          | 9       | 104      | 250               | 1          | 3            | 410        | 4           | 12  | 144      | 11           | 6            | 48  | 4               | 33          | 169   | 5          | 34          |
| 27      | 0          | 10      | 97       | 128               | 1          | 3            | 407        | 3           | 56  | 103      | 14           | 12           | 31  | 5               | 45          | 71    | 8          | 28          |
| 28      | 0          | 10      | 100      | 167               | 1          | 2            | 410        | 3           | 17  | 115      | 14           | 8            | 42  | 4               | 40          | 102   | 8          | 20          |
| 29      | 1          | 9       | 104      | 134               | 1          | 0            | 327        | 3           | 17  | 108      | 8            | 3            | 23  | 2               | 26          | 88    | 134        | 84          |
| 30      | 0          | 9       | 104      | 284               | 0          | 7            | 345        | 3           | 16  | 89       | 14           | 7            | 96  | 4               | 42          | 173   | 7          | 42          |
| 31      | 0          | 8       | 104      | 158               | 2          | 0            | 295        | 3           | 45  | 125      | 11           | 13           | 22  | 3               | 33          | 95    | 13         | 9           |
| 32      | 1          | 9       | 104      | 134               | 1          | 3            | 315        | 4           | 28  | 121      | 14           | 7            | 39  | 4               | 41          | 52    | 7          | 30          |
| 33      | 0          | 10      | 99       | 157               | 1          | 1            | 351        | 2           | 16  | 146      | 13           | 9            | 62  | 4               | 40          | 67    | 7          | 28          |
| 34      | 0          | 8       | 104      | 141               | 1          | 3            | 410        | 3           | 12  | 85       | 11           | 15           | 32  | 3               | 33          | 89    | 5          | 28          |
| 35      | 0          | 9       | 95       | 258               | 1          | 3            | 428        | 4           | 68  | 171      | 10           | 6            | 66  | 4               | 33          | 159   | 10         | 21          |
| 36      | 0          | 9       | 100      | 211               | 1          | 2            | 363        | 3           | 18  | 102      | 13           | 11           | 77  | 4               | 41          | 121   | 7          | 36          |
| 37      | 0          | 9       | 103      | 185               | 1          | 6            | 356        | 3           | 31  | 99       | 10           | 6            | 52  | 4               | 31          | 105   | 7          | 21          |
| 38      | 0          | 8       | 100      | 172               | 0          | 4            | 312        | 2           | 19  | 94       | 14           | 7            | 61  | 5               | 41          | 86    | 12         | 34          |
| 39      | 1          | 8       | 102      | 146               | 1          | 1            | 602        | 2           | 19  | 103      | 8            | 7            | 33  | 2               | 24          | 89    | 2          | 43          |
| 40      | 0          | 9       | 99       | 180               | 2          | 3            | 388        | 4           | 20  | 118      | 14           | 14           | 37  | 4               | 43          | 58    | 6          | 27          |
| 41      | 0          | 9       | 97       | 244               | 1          | 2            | 314        | 3           | 65  | 288      | 12           | 18           | 54  | 4               | 38          | 155   | 13         | 20          |
| 42      | 0          | 10      | 100      | 162               | 0          | 3            | 372        | 4           | 17  | 90       | 13           | 7            | 63  | 4               | 38          | 85    | 8          | 26          |
| 43      | 0          | 9       | 98       | 151               | 0          | 1            | 312        | 4           | 35  | 168      | 13           | 3            | 96  | 4               | 38          | 34    | 4          | 30          |
| 44      | 0          | 9       | 101      | 239               | 0          | 3            | 589        | 3           | 34  | 253      | 14           | 11           | 37  | 5               | 44          | 167   | 8          | 32          |
| 45      | 0          | 9       | 101      | 125               | 1          | 11           | 513        | 3           | 20  | 102      | 12           | 8            | 44  | 4               | 37          | 34    | 7          | 37          |
| 46      | 0          | 9       | 103      | 195               | 0          | 2            | 413        | 3           | 12  | 95       | 14           | 11           | 49  | 4               | 42          | 121   | 7          | 34          |
| 47      | 1          | 9       | 108      | 189               | 0          | 3            | 400        | 2           | 10  | 101      | 14           | 8            | 72  | 4               | 41          | 102   | 4          | 36          |
| 48      | 0          | 7       | 101      | 151               | 1          | 1            | 998        | 3           | 59  | 160      | 6            | 8            | 40  | 2               | 20          | 89    | 17         | 9           |
| 49      | 0          | 9       | 100      | 185               | 0          | 2            | 317        | 3           | 12  | 96       | 13           | 4            | 83  | 4               | 40          | 90    | 5          | 27          |
| 50      |            | 9       | 101      | 239               | 0          | 1            | 239        | 4           | 32  | 86       | 13           | 11           | 60  | 3               | 39          | 123   | 7          | 27          |
| 51      | 0          | 9       | 98       | 149               | 1          | 3            | 750        | 5           | 71  | 105      | 11           | 12           | 32  | 4               | 35          | 71    | 20         | 31          |
| 52      | 0          | 9       | 102      | 213               | 0          | 2            | 380        | 3           | 140 | 104      | 13           | 5            | 64  | 4               | 40          | 127   | 4          | 32          |
| 53      | 0          | 9       | 101      | 199               | 0          | 5            | 429        | 3           | 13  | 87       | 12           | 6            | 77  | 5               | 40          | 97    | 6          | 30          |
| 54      | 0          | 8       | 101      | 209               | 0          | 4            | 439        | 2           | 18  | 113      | 15           | 3            | 48  | 5               | 46          | 143   | 6          | 23          |
| 55      | 1          | 9       | 94       | 283               | 0          | 0            | 538        | 3           | 58  | 168      | 12           | 13           | 61  | 5               | 39          | 179   | 6          | 14          |
| 56      | 0          | 9       | 109      | 176               | 0          | 1            | 299        | 4           | 16  | 101      | 14           | 11           | 75  | 4               | 43          | 88    | 9          | 28          |
| 57      | 0          | 9       | 104      | 175               | 1          | 3            | 340        | 3           | 23  | 100      | 14           | 5            | 38  | 5               | 42          | 109   | 5          | 37          |
| 58      | 0          | 10      | 103      | 119               | 0          | 2            | 499        | 4           | 37  | 110      | 15           | 7            | 40  | 5               | 45          | 36    | 9          | 25          |
| 59      | 0          | 9       | 103      | 188               | 1          | 3            | 407        | 3           | 19  | 151      | 11           | 15           | 55  | 3               | 33          | 101   | 6          | 39          |
| 60      | 1          | 8       | 109      | 153               | 0          | 1            | 206        | 3           | 288 | 103      | 11           | 10           | 69  | 3               | 35          | 67    | 7          | 24          |
| 61      | 0          | 10      | 100      | 199               | 1          | 4            | 446        | 4           | 82  | 102      | 12           | 23           | 68  | 4               | 37          | 107   | 6          | 41          |
| 62      | 0          | 10      | 104      | 187               | 0          | 1            | 275        | 2           | 166 | 104      | 12           | 69           | 4   | 4               | 39          | 97    | 9          | 27          |
| 63      | 0          | 9       | 102      | 149               | 0          | 3            | 172        | 3           | 21  | 105      | 13           | 11           | 72  | 4               | 40          | 66    | 5          | 30          |
| 64      | 0          | 9       | 95       | 173               | 0          | 4            | 583        | 4           | 15  | 187      | 11           | 10           | 49  | 4               | 35          | 98    | 8          | 29          |
| 65      | 0          | 9       | 104      | 208               | 0          | 2            | 261        | 3           | 39  | 97       | 14           | 6            | 87  | 4               | 42          | 107   | 4          | 34          |
| 66      | 0          | 9       | 104      | 204               | 0          | 2            | 351        | 3           | 25  | 97       | 14           | 4            | 71  | 4               | 41          | 115   | 5          | 37          |
| 67      | 0          | 8       | 103      | 185               | 1          | 3            | 287        | 3           | 32  | 90       | 10           | 21           | 57  | 3               | 34          | 98    | 2          | 35          |
| 68      | 0          | 8       | 106      | 211               | 0          | 2            | 480        | 3           | 58  | 88       | 9            | 31           | 39  | 3               | 30          | 150   | 9          | 14          |
| 69      | 0          | 9       | 103      | 225               | 0          | 4            | 320        | 4           | 19  | 100      | 15           | 5            | 69  | 5               | 45          | 131   | 5          | 46          |
| 70      | 0          | 9       | 104      | 225               | 0          | 2            | 3          | 3           | 12  | 107      | 13           | 5            | 66  | 4               | 40          | 142   | 5          | 25          |
| 71      | 1          | 9       | 104      | 204               | 1          | 2            | 371        | 3           | 73  | 113      | 15           | 7            | 57  | 5               | 47          | 128   | 6          | 31          |
| 72      | 0          | 9       | 102      | 201               | 1          | 6            | 538        | 3           | 16  | 131      | 11           | 9            | 47  | 4               | 37          | 134   | 7          | 32          |
| 73      | 0          | 9       | 101      | 160               | 1          | 2            | 368        | 3           | 16  | 248      | 12           | 7            | 43  | 4               | 38          | 82    | 9          | 36          |
| 74      | 0          | 9       | 102      | 198               | 0          | 7            | 636        | 3           | 38  | 117      | 13           | 11           | 58  | 5               | 41          | 67    | 7          | 23          |
| 75      | 0          | 9       | 105      | 229               | 1          | 5            | 358        | 2           | 19  | 104      | 13           | 7            | 54  | 4               | 39          | 153   | 6          | 27          |
| 76      | 0          | 9       | 107      | 173               | 0          | 1            | 373        | 3           | 36  | 92       | 12           | 50           | 83  | 3               | 40          | 79    | 7          | 38          |
| 77      | 0          | 9       | 105      | 224               | 1          | 7            | 313        | 3           | 42  | 106      | 14           | 8            | 63  | 5               | 44          | 148   | 6          | 28          |
| 78      | 0          | 9       | 101      | 199               | 0          | 3            | 248        | 4           | 29  | 150      | 12           | 6            | 51  | 4               | 38          | 106   | 8          | 34          |
| 79      | 0          | 9       | 98       | 225               | 0          | 4            | 554        | 3           | 19  | 170      | 12           | 7            | 52  | 4               | 37          | 147   | 9          | 35          |
| 80      |            |         | 111      |                   |            | 2            | 380        |             |     |          | 12           |              |     | 4               | 36          | 0     | 5          | 26          |
| 81      | 0          | 9       | 97       | 237               | 0          | 4            | 372        | 3           | 47  | 96       | 16           | 10           | 48  | 5               | 48          | 136   | 10         | 23          |
| 82      | 0          | 9       | 102      | 199               | 1          | 2            | 571        | 3           | 13  | 111      | 14           | 13           | 49  | 4               | 42          | 132   | 7          | 29          |
| 83      | 1          | 9       | 101      | 185               | 0          | 0            | 458        | 3           | 15  | 106      | 16           | 12           | 40  | 5               | 45          | 120   | 11         | 15          |
| 84      | 0          | 9       | 96       | 202               | 1          | 1            | 426        | 3           | 20  | 94       | 13           | 21           | 62  | 4               | 38          | 111   | 12         | 22          |
| 85      | 0          | 9       | 108      | 156               | 1          | 1            | 275        | 3           | 8   | 97       | 13           | 13           | 33  | 4               | 42          | 103   | 7          | 21          |
| 86      | 0          | 9       | 102      | 224               | 1          | 1            | 349        | 3           | 27  | 88       | 13           | 14           | 69  | 4               | 40          | 140   | 9          | 27          |
| 87      | 0          | 9       | 102      | 162               | 1          | 6            | 436        | 4           | 16  | 87       | 10           | 14           | 37  | 3               | 31          | 102   | 6          | 34          |
| 88      | 1          | 9       | 102      | 250               | 0          | 4            | 330        | 2           | 20  | 101      | 13           | 6            | 49  | 4               | 40          | 185   | 5          | 29          |
| 89      | 0          | 9       | 102      | 160               | 0          | 2            | 508        | 3           | 31  | 110      | 13           | 6            | 67  | 4               | 42          | 69    | 7          | 34          |
| 90      | 0          | 9       | 93       | 108               | 1          | 2            | 855        | 3           | 27  | 103      | 13           | 6            | 39  | 4               | 36          | 47    | 14         | 9           |
| 91      |            |         |          |                   |            |              |            |             |     |          |              |              |     |                 |             |       |            |             |

**Dataset. Relationship between Urinary Level of Phytate and Valvular Calcification in an Elderly Population: a Cross-Sectional Study**

| Subject | BillirubinT | Calcium | Chloride | Cholesterol Total | Creatinine | Eosinophiles | Fibrinogen | Phosphorous | GGT | Glycemia | Haemoglobine | Homocysteine | HDL | Hematies (10^6) | Haematocrit | LDL-C | Leukocytes | Lymphocytes |
|---------|-------------|---------|----------|-------------------|------------|--------------|------------|-------------|-----|----------|--------------|--------------|-----|-----------------|-------------|-------|------------|-------------|
| 96      | 0           | 9       | 100      | 195               | 0          | 3            | 340        | 3           | 48  | 110      | 14           | 10           | 57  | 4               | 42          | 114   | 6          | 30          |
| 97      | 0           | 9       | 100      | 192               | 1          | 1            | 372        | 3           | 24  | 124      | 14           |              | 39  | 4               | 41          | 133   | 5          | 18          |
| 98      | 1           | 8       | 94       | 141               | 1          | 1            | 352        | 5           | 86  | 107      | 14           |              | 31  | 4               | 39          | 95    | 10         | 24          |
| 99      | 0           | 8       | 109      | 142               | 1          | 0            | 440        | 3           | 24  | 104      | 9            | 18           | 44  | 3               | 27          | 74    | 5          | 7           |
| 100     | 0           | 9       | 104      | 163               | 0          | 0            | 257        | 2           | 14  | 102      | 13           | 8            | 41  | 4               | 40          | 88    | 4          | 29          |
| 101     | 0           | 9       | 98       | 268               | 1          | 2            | 447        | 3           | 27  | 133      | 15           | 10           | 59  | 5               | 44          | 193   | 8          | 25          |
| 102     | 0           | 9       | 107      | 225               | 1          | 3            | 286        | 3           | 30  | 110      | 45           | 14           | 48  | 5               | 48          | 155   | 6          | 26          |
| 103     | 0           | 9       | 97       | 177               | 0          | 5            | 364        | 3           | 17  | 111      | 12           | 8            | 53  | 4               | 37          | 100   | 6          | 32          |
| 104     | 0           | 9       | 98       | 175               | 1          | 5            | 475        | 3           | 158 | 106      | 9            | 11           | 29  | 3               | 28          | 81    | 6          | 30          |
| 105     | 0           | 9       | 98       | 214               | 0          | 0            | 320        | 3           | 20  | 147      | 12           | 9            | 52  | 4               | 37          | 142   | 9          | 27          |
| 106     | 1           | 10      | 103      | 241               | 1          | 1            | 390        | 3           | 71  | 154      | 13           | 10           | 52  | 4               | 41          | 99    | 6          | 38          |
| 107     | 0           | 10      | 104      | 166               | 1          | 1            | 407        | 3           | 55  | 176      | 12           | 6            | 39  | 4               | 37          | 85    | 13         | 32          |
| 108     | 0           | 9       | 98       | 221               | 0          | 3            | 423        | 2           | 27  | 109      | 14           | 7            | 52  | 4               | 41          | 145   | 8          | 28          |
| 109     | 1           | 9       | 95       | 203               | 1          | 2            | 367        | 3           | 48  | 103      | 16           | 11           | 52  | 5               | 46          | 117   | 6          | 35          |
| 110     | 0           | 9       | 106      | 164               | 0          | 2            | 363        | 4           | 42  | 104      | 12           | 4            | 64  | 4               | 36          | 90    | 5          | 37          |
| 111     | 0           | 9       | 104      | 126               | 1          | 0            | 447        | 3           | 14  | 43       | 13           | 13           | 55  | 5               | 42          | 56    | 7          | 16          |
| 112     | 1           | 9       | 103      | 173               | 1          | 2            | 348        | 3           | 20  | 111      | 16           | 7            | 50  | 5               | 49          | 101   | 6          | 30          |
| 113     | 0           | 8       | 105      | 151               | 0          | 2            | 484        | 3           | 13  | 94       | 13           | 7            | 46  | 4               | 40          | 86    | 7          | 28          |
| 114     | 1           | 9       | 100      | 206               | 0          | 4            | 243        | 4           | 14  | 90       | 14           | 7            | 53  | 4               | 43          | 139   | 4          | 29          |
| 115     | 0           | 9       | 105      | 207               | 1          | 2            | 319        | 4           | 17  | 113      | 13           | 8            | 37  | 4               | 40          | 101   | 7          | 37          |
| 116     | 0           | 8       | 102      | 188               | 1          | 3            | 333        | 2           | 19  | 94       | 15           | 105          | 48  | 5               | 46          | 108   | 4          | 34          |
| 117     | 0           | 9       | 99       | 144               | 1          | 3            | 442        | 4           | 64  | 91       | 10           | 17           | 52  | 3               | 31          | 74    | 9          | 15          |
| 118     | 0           | 9       | 100      | 183               | 0          | 1            | 433        | 3           | 32  | 142      | 10           | 4            | 58  | 4               | 33          | 105   | 8          | 45          |
| 119     | 0           | 9       | 106      | 218               | 0          | 2            | 279        | 4           | 26  | 93       | 12           | 9            | 115 | 4               | 40          | 88    | 4          | 28          |
| 120     | 0           | 9       | 103      | 167               | 0          | 2            | 329        | 4           | 11  | 94       | 12           | 6            | 48  | 4               | 38          | 95    | 5          | 33          |
| 121     | 0           | 9       | 96       | 168               | 0          | 5            |            | 4           | 29  | 191      | 12           | 4            | 35  | 4               | 36          | 113   | 11         | 33          |
| 122     | 0           | 9       | 100      | 169               | 0          | 1            | 383        | 4           | 31  | 156      | 12           | 14           | 48  | 4               | 37          | 95    | 7          | 24          |
| 123     | 1           | 9       | 104      | 172               | 0          | 6            | 430        | 3           | 17  | 84       | 15           | 7            | 73  | 5               | 48          | 88    | 4          | 28          |
| 124     | 0           | 9       | 99       | 253               | 0          | 2            | 375        | 4           | 34  | 92       | 11           | 9            | 39  | 4               | 32          | 154   | 4          | 32          |
| 125     | 0           | 9       | 105      | 138               | 1          | 2            | 308        | 2           | 11  | 115      | 14           | 16           | 42  | 5               | 42          | 82    | 7          | 23          |
| 126     | 0           | 9       | 106      | 166               | 0          | 1            | 333        | 3           | 8   | 94       | 11           | 19           | 44  | 4               | 35          | 95    | 8          | 27          |
| 127     | 0           | 9       | 100      | 198               | 0          | 1            | 570        | 4           | 29  | 90       | 15           | 17           | 58  | 4               | 47          | 125   | 4          | 28          |
| 128     | 0           | 10      | 109      | 188               | 1          | 1            | 299        | 3           | 9   | 79       | 14           | 9            | 83  | 4               | 43          | 83    | 8          | 40          |
| 129     | 0           | 9       | 105      | 208               | 1          | 2            | 402        | 3           | 21  | 111      | 14           | 12           | 49  | 4               | 43          | 140   | 6          | 24          |
| 130     | 0           | 8       | 103      | 170               | 0          | 4            | 346        | 3           | 21  | 82       | 13           | 5            | 45  | 4               | 40          | 108   | 7          | 33          |
| 131     | 0           | 9       | 95       | 119               | 3          | 3            | 865        | 7           | 14  | 201      | 9            | 27           | 44  | 3               | 28          | 35    | 12         | 21          |
| 132     | 0           | 9       | 101      | 114               | 0          | 0            | 310        | 3           | 16  | 98       | 14           | 5            | 59  | 5               | 42          | 45    | 12         | 13          |
| 133     | 0           | 10      | 104      | 271               | 0          | 0            |            | 3           | 13  | 78       | 14           | 7            | 106 | 4               | 45          | 136   | 5          | 45          |
| 134     | 0           | 9       | 103      | 186               | 0          | 2            | 455        | 3           | 36  | 112      | 13           | 8            | 58  | 4               | 39          | 102   | 9          | 15          |
| 135     | 0           | 9       | 98       | 139               | 0          | 1            | 583        | 2           | 50  | 88       | 10           | 6            | 40  | 3               | 31          | 76    | 6          | 28          |
| 136     | 0           | 9       | 102      | 218               | 0          | 2            | 527        | 3           | 114 | 94       | 16           | 6            | 36  | 5               | 47          | 137   | 11         | 28          |
| 137     | 0           | 9       | 103      | 229               | 0          | 2            | 622        | 4           | 27  | 82       | 14           | 5            | 53  | 4               | 44          | 149   | 10         | 33          |
| 138     | 0           | 9       | 104      | 155               | 0          | 7            | 486        | 4           | 12  | 93       | 12           | 9            | 43  | 4               | 36          | 97    | 6          | 28          |
| 139     | 0           | 9       | 101      | 208               | 0          | 5            | 347        | 3           | 12  | 105      | 11           |              | 98  | 3               | 32          | 102   | 5          | 38          |
| 140     |             | 9       | 99       | 509               | 0          | 2            | 499        | 2           | 65  | 159      | 14           | 9            | 94  | 4               | 41          | 415   | 9          | 24          |
| 141     | 0           | 8       | 102      | 195               | 1          | 2            | 600        | 2           | 21  | 178      | 14           | 15           | 43  | 4               | 44          | 82    | 10         | 25          |
| 142     | 0           | 9       | 97       | 115               | 1          | 1            | 419        | 4           | 33  | 91       | 12           | 19           | 38  | 4               | 36          | 62    | 8          | 23          |
| 143     | 0           | 9       | 92       | 208               | 0          | 3            | 273        | 3           | 22  | 85       | 15           | 8            | 93  | 5               | 45          | 99    | 6          | 38          |
| 144     | 0           | 9       | 105      | 174               | 0          | 1            | 365        | 4           | 21  | 101      | 12           | 12           | 57  | 4               | 39          | 96    | 6          | 30          |
| 145     | 0           | 9       | 103      | 253               | 1          | 2            | 331        | 3           | 15  | 175      | 15           | 15           | 41  | 4               | 44          | 184   | 5          | 32          |
| 146     | 1           | 9       | 102      | 172               | 0          | 2            | 458        | 3           | 28  | 97       | 14           | 6            | 44  | 5               | 44          | 113   | 7          | 21          |
| 147     | 0           | 9       | 104      | 201               | 0          | 3            | 310        | 3           | 10  | 95       | 10           | 7            | 61  | 4               | 34          | 113   | 5          | 31          |
| 148     | 0           | 9       | 103      | 211               | 0          | 2            | 370        | 3           | 23  | 165      | 13           | 16           | 65  | 4               | 41          | 113   | 6          | 22          |
| 149     | 0           | 10      | 105      | 241               | 0          | 2            | 374        | 3           | 44  | 98       | 14           | 6            | 68  | 5               | 45          | 151   | 5          | 46          |
| 150     | 1           | 9       | 101      | 165               | 0          | 2            | 188        | 2           | 55  | 107      | 16           | 12           | 33  | 5               | 46          | 112   | 5          | 34          |
| 151     | 1           | 9       | 103      | 205               | 0          | 2            | 335        | 4           | 11  | 233      | 12           | 4            | 43  | 4               | 38          | 121   | 9          | 32          |
| 152     | 0           | 9       | 99       | 185               | 0          | 1            | 316        | 4           | 18  | 112      | 12           | 10           | 41  | 4               | 35          | 128   | 5          | 32          |
| 153     |             | 9       | 102      | 185               | 0          | 2            |            | 4           | 22  | 96       | 15           | 10           | 55  | 5               | 47          | 85    | 7          | 17          |
| 154     | 1           | 9       | 107      | 190               | 0          | 6            | 352        | 2           | 15  | 96       | 14           | 118          | 47  | 3               | 40          | 126   | 4          | 31          |
| 155     | 0           | 8       | 103      | 217               | 0          | 1            | 398        | 3           | 8   | 109      | 12           | 6            | 57  | 4               | 35          | 129   | 6          | 32          |
| 156     | 0           | 8       | 100      | 161               | 0          | 4            | 625        | 4           | 12  | 96       | 9            | 8            | 50  | 3               | 29          | 77    | 10         | 22          |
| 157     | 0           | 9       | 99       | 233               | 0          | 1            | 296        | 3           | 9   | 93       | 13           | 4            | 54  | 4               | 39          | 162   | 4          | 32          |
| 158     | 0           | 9       | 104      | 207               | 1          | 3            | 373        | 3           | 40  | 93       | 16           | 11           | 52  | 5               | 47          | 134   | 6          | 27          |
| 159     | 0           | 9       | 105      | 164               | 0          | 1            | 383        | 2           | 20  | 113      | 13           | 3            | 53  | 4               | 39          | 98    | 6          | 19          |
| 160     | 0           | 9       | 99       | 192               | 1          | 2            | 49         | 4           | 122 | 95       | 14           | 28           | 53  | 4               | 42          | 111   | 12         | 41          |
| 161     | 1           | 9       | 106      | 180               | 1          | 2            | 274        | 3           | 19  | 94       | 16           | 5            | 73  | 5               | 46          | 95    | 4          | 41          |
| 162     | 0           | 9       | 103      | 165               | 0          | 2            | 319        | 3           | 12  | 101      | 12           | 3            | 74  | 4               | 37          | 74    | 5          | 30          |
| 163     | 0           | 10      | 101      | 237               | 1          | 1            | 265        | 3           | 83  | 99       | 17           | 5            | 75  | 5               | 50          | 117   | 5          | 23          |
| 164     | 0           | 9       | 99       | 155               | 0          | 6            | 527        | 3           | 137 | 85       | 12           | 6            | 42  | 5               | 38          | 97    | 6          | 27          |
| 165     | 1           | 9       | 104      | 205               | 0          | 4            | 260        | 3           | 32  | 104      | 13           | 4            | 55  | 4               | 40          | 132   | 5          | 30          |
| 166     | 0           | 8       | 107      | 195               | 1          | 0            | 321        | 2           | 22  | 117      | 16           | 11           | 38  | 5               | 48          | 123   | 8          | 25          |
| 167     | 0           | 9       | 100      | 177               | 0          | 2            | 264        | 2           | 38  | 108      | 14           | 5            | 52  | 5               | 41          | 103   | 5          | 31          |
| 168     | 0           | 10      | 103      | 189               | 0          | 2            | 313        | 3           | 21  | 169      | 13           | 12           | 49  | 5               | 41          | 96    | 6          | 36          |
| 169     | 0           | 9       | 98       | 180               | 1          | 2            | 412        | 4           | 44  | 130      | 11           |              | 43  | 4               | 32          | 106   | 8          | 15          |
| 170     | 0           | 9       | 109      | 217               | 0          | 3            |            | 3           | 13  | 81       | 13           | 28           | 68  | 4               | 42          | 125   | 4          | 48          |
| 171     | 0           | 9       | 105      | 255               | 1          | 1            | 345        | 3           | 15  | 117      | 14           |              | 38  | 4               | 40          | 171   | 7          | 32          |
| 172     | 0           | 9       | 105      | 221               | 0          | 3            | 361        | 4           | 11  | 102      | 14           | 4            | 97  | 4               | 43          | 114   | 6          | 39          |
| 173     | 0           | 9       | 102      | 179               | 0          | 2            | 236        | 3           | 13  | 101      | 13           | 5            | 54  | 4               | 39          | 98    | 6          | 60          |
| 174     | 0           | 9       | 101      | 175               | 0          | 1            | 393        | 5           | 36  | 160      | 11           |              | 71  | 4               | 34          | 90    | 7          | 30          |
| 175     | 0           | 8       | 111      | 227               | 0          | 1            | 330        | 3           | 18  | 84       | 13           | 3            | 49  | 5               | 39          | 141   | 5          | 34          |
| 176     | 0           | 10      | 97       | 192               | 1          | 1            | 393        | 3           | 48  | 211      | 14           | 21           | 48  | 5               | 42          | 119   | 8          | 25          |
| 177     | 0           | 9       | 101      | 209               | 1          | 4            | 338        | 4           | 65  | 99       | 15           | 7            | 48  | 5               | 44          | 110   | 8          | 25          |
| 178     | 0           | 9       | 104      | 147               | 3          | 3            | 557        | 4           | 55  | 101      | 8            | 15           | 45  | 3               | 27          | 69    | 7          | 15          |
| 179     |             |         | 101      |                   |            | 3            | 415        |             |     |          | 14           |              |     | 4               | 41          | 0     | 6          | 33          |
| 180     | 0           | 9       | 100      | 241               | 0          | 1            | 380        | 4           | 28  | 115      | 14           | 8            | 48  | 5               | 44          | 156   | 6          | 38          |
| 181     |             | 8       | 91       | 164               | 0          | 2            | 855        | 3           | 132 | 86       | 11           | 9            | 43  | 3               | 35          | 106   | 10         | 5           |
| 182     |             | 9       | 91       | 226               | 1          | 2            | 793        | 4           | 59  | 134      | 7            | 8            | 45  | 2               | 24          | 144   | 6          | 21          |
| 183     | 0           | 9       | 106      | 152               | 1          | 2            | 152        | 4           | 23  | 73       | 15           | 10           | 57  | 5               | 44          | 75    | 6          | 27          |
| 184     | 0           | 9       | 101      | 201               | 0          | 1            | 254        | 5           | 9   | 90       | 10           | 9            | 70  | 4               | 35          | 105   | 8          | 24          |
| 185     | 0           | 11      | 103      | 249               | 0          | 2            | 407        | 4           | 33  | 114      | 13           |              | 55  | 4               |             |       |            |             |

# Dataset. Relationship between Urinary Level of Phytate and Valvular Calcification in an Elderly Population: a Cross-Sectional Study

| Subject | neutrophil_lymphocyte_ratio | LPA | Magnesium | Monocytes | Neutrophils | Potasium | Total protein | PTHi | Sodium | Triglycerides | Urea | Uric | VSG | MAC_1<br>no or<br>mild_2 |        |           |
|---------|-----------------------------|-----|-----------|-----------|-------------|----------|---------------|------|--------|---------------|------|------|-----|--------------------------|--------|-----------|
|         |                             |     |           |           |             |          |               |      |        |               |      |      |     | 1yes_                    | mod or | terciles_ |
| 1       | 2,23                        | 37  | 2         | 11        | 58          | 4        | 77            | 45   | 138    | 94            | 120  | 8    | 54  | 1                        | 2      | 1         |
| 2       | 3,09                        | 20  | 1         | 10        | 68          | 4        | 73            | 214  | 138    | 122           | 135  | 5    | 100 | 2                        | 1      | 1         |
| 3       | 4,93                        | 4   | 1         | 8         | 74          | 4        | 62            | 29   | 142    | 71            | 34   | 4    | 7   | 1                        | 2      | 1         |
| 4       | 1,56                        | 17  | 1         | 10        | 53          | 4        | 77            | 58   | 141    | 86            | 42   | 6    | 9   | 2                        | 1      | 1         |
| 5       | 1,34                        | 33  | 2         | 9         | 51          | 4        | 81            | 36   | 137    | 151           | 44   | 5    | 31  | 2                        | 1      | 1         |
| 6       | 4,18                        | 43  | 2         | 7         | 71          | 4        | 64            | 48   | 139    | 66            | 30   | 8    | 5   | 2                        | 1      | 1         |
| 7       | 3,1                         | 25  | 2         | 8         | 65          | 4        | 74            | 56   | 137    | 115           | 78   | 6    | 2   | 1                        | 1      | 1         |
| 8       | 4,56                        | 8   | 1         | 7         | 73          | 4        | 61            | 56   | 135    | 166           | 93   | 8    | 104 | 1                        | 1      | 1         |
| 9       | 2,28                        | 65  | 2         | 8         | 57          | 5        | 66            | 98   | 141    | 112           | 140  | 9    | 14  | 1                        | 1      | 1         |
| 10      | 3,05                        | 19  | 2         | 10        | 64          | 5        | 59            | 36   | 141    | 67            | 41   | 3    | 23  | 1                        | 1      | 1         |
| 11      | 1,72                        | 85  | 1         | 6         | 55          | 3        | 72            | 84   | 142    | 164           | 26   | 4    | 11  | 2                        | 1      | 1         |
| 12      | 4,13                        | 58  | 2         | 11        | 66          | 5        | 78            | 60   | 140    | 140           | 102  | 7    | 34  | 2                        | 2      | 1         |
| 13      | 1,7                         | 35  | 2         | 7         | 56          | 4        | 70            | 42   | 141    | 62            | 52   | 5    | 2   | 2                        | 2      | 1         |
| 14      | 2,79                        | 16  | 2         | 5         | 67          | 5        | 69            | 39   | 139    | 139           | 35   | 7    | 8   | 2                        | 1      | 1         |
| 15      | 1,76                        | 26  | 2         | 5         | 58          | 4        | 71            | 46   | 141    | 136           | 20   | 4    | 12  | 1                        | 1      | 1         |
| 16      | 2,58                        | 162 | 2         | 8         | 62          | 4        | 83            | 122  | 143    | 239           | 47   | 2    | 56  | 2                        | 1      | 1         |
| 17      | 6,23                        | 7   | 2         | 4         | 81          | 4        | 63            | 236  | 139    | 69            | 82   | 8    | 21  | 2                        | 1      | 1         |
| 18      | 3,89                        | 22  | 2         | 6         | 70          | 4        | 69            | 101  | 142    | 277           | 92   | 10   | 54  | 1                        | 2      | 1         |
| 19      | 1,44                        | 131 | 2         | 10        | 52          | 3        | 60            | 30   | 142    | 112           | 31   | 3    | 50  | 1                        | 2      | 1         |
| 20      | 4,69                        | 19  | 1         | 5         | 75          | 4        | 68            | 49   | 143    | 115           | 57   | 5    | 11  | 2                        | 2      | 1         |
| 21      | 2,07                        | 32  | 1         | 7         | 60          | 4        | 72            | 62   | 140    | 131           | 27   | 5    | 20  | 2                        | 1      | 1         |
| 22      | 1,57                        | 14  | 1         | 9         | 55          | 4        | 66            | 37   | 143    | 161           | 59   | 6    | 9   | 2                        | 1      | 1         |
| 23      | 1,15                        | 72  | 2         | 9         | 46          | 4        | 75            | 44   | 140    | 104           | 40   | 5    | 3   | 2                        | 2      | 1         |
| 24      | 0,59                        | 158 | 2         | 7         | 33          | 5        | 84            | 121  | 141    | 159           | 113  | 10   | 32  | 1                        | 2      | 1         |
| 25      | 1,67                        | 107 | 2         | 7         | 55          | 4        | 77            | 56   | 143    | 225           | 22   | 5    | 21  | 2                        | 1      | 1         |
| 26      | 1,59                        | 117 | 1         | 8         | 54          | 4        | 74            | 34   | 143    | 163           | 41   | 9    | 39  | 2                        | 2      | 1         |
| 27      | 2,14                        | 14  | 1         | 7         | 60          | 5        | 76            | 24   | 140    | 130           | 58   | 6    | 25  | 1                        | 2      | 1         |
| 28      | 3,4                         | 224 | 1         | 8         | 68          | 4        | 72            | 29   | 141    | 114           | 57   | 7    | 11  | 1                        | 1      | 1         |
| 29      | 0                           | 82  | 1         | 12        | 0           | 4        | 57            | 10   | 142    | 112           | 37   | 6    | 29  | 1                        | 2      | 1         |
| 30      | 1,02                        | 36  | 1         | 7         | 43          | 4        | 74            | 28   | 143    | 71            | 48   | 4    | 14  | 2                        | 1      | 1         |
| 31      | 9,22                        | 66  | 1         | 6         | 83          | 4        | 61            | 51   | 134    | 202           | 98   | 10   | 24  | 2                        | 1      | 1         |
| 32      | 1,83                        | 12  | 2         | 9         | 55          | 4        | 74            | 32   | 144    | 215           | 48   | 9    | 9   | 1                        | 2      | 1         |
| 33      | 2,14                        | 26  | 1         | 8         | 60          | 4        | 72            | 101  | 140    | 137           | 58   | 6    | 12  | 2                        | 1      | 1         |
| 34      | 2,11                        | 9   | 2         | 9         | 59          | 4        | 65            | 34   | 140    | 99            | 64   | 8    | 54  | 2                        | 1      | 1         |
| 35      | 3,24                        | 2   | 1         | 6         | 68          | 4        | 63            | 58   | 139    | 165           | 60   | 6    | 64  | 1                        | 2      | 1         |
| 36      | 1,42                        | 44  | 2         | 9         | 51          | 4        | 75            | 40   | 145    | 63            | 35   | 3    | 14  | 1                        | 1      | 1         |
| 37      | 2,81                        | 18  | 2         | 8         | 59          | 4        | 69            | 27   | 142    | 136           | 40   | 6    | 12  | 1                        | 2      | 1         |
| 38      | 1,53                        |     | 1         | 12        | 52          | 4        | 67            | 66   | 139    | 121           | 69   | 7    | 7   | 2                        | 1      | 1         |
| 39      | 1                           | 58  | 1         | 12        | 43          | 4        | 58            | 51   | 143    | 117           | 36   | 6    | 100 | 2                        | 2      | 1         |
| 40      | 2,26                        | 21  | 2         | 6         | 61          | 4        | 78            | 149  | 142    | 423           | 120  | 9    | 15  | 2                        | 2      | 1         |
| 41      | 3,5                         | 18  | 2         | 6         | 70          | 4        | 84            | 30   | 136    | 174           | 124  | 11   | 63  | 1                        | 1      | 1         |
| 42      | 2,42                        | 16  | 1         | 6         | 63          | 4        | 73            | 34   | 144    | 67            | 38   | 5    | 17  | 1                        | 1      | 1         |
| 43      | 2,03                        | 125 | 1         | 6         | 61          | 4        | 72            | 56   | 139    | 102           | 49   | 4    | 11  | 1                        | 1      | 1         |
| 44      | 1,78                        | 73  | 2         | 7         | 57          | 4        | 69            | 42   | 135    | 175           | 41   | 6    | 35  | 2                        | 1      | 1         |
| 45      | 1,22                        | 15  | 1         | 6         | 45          | 4        | 79            | 28   | 141    | 232           | 45   | 4    | 37  | 2                        | 1      | 1         |
| 46      | 1,62                        | 7   | 1         | 7         | 55          | 4        | 66            | 40   | 142    | 124           | 32   | 4    | 6   | 2                        | 1      | 1         |
| 47      | 1,47                        | 55  | 2         | 7         | 53          | 4        | 68            | 102  | 147    | 73            | 32   | 4    | 6   | 2                        | 1      | 1         |
| 48      | 9,44                        | 157 | 1         | 3         | 85          | 3        | 41            | 208  | 142    | 110           | 123  | 7    | 152 | 1                        | 1      | 1         |
| 49      | 2,33                        | 89  | 1         | 10        | 63          | 4        | 72            | 56   | 141    | 58            | 28   | 3    |     | 2                        | 1      | 1         |
| 50      | 2,3                         | 49  | 1         | 6         | 62          |          | 61            | 51   | 139    | 277           | 50   | 5    | 6   | 1                        | 2      | 1         |
| 51      | 1,84                        | 270 | 1         | 7         | 57          | 4        | 68            | 50   | 141    | 228           | 64   | 12   | 106 | 1                        | 2      | 1         |
| 52      | 1,72                        | 6   | 2         | 10        | 55          | 4        | 71            | 59   | 142    | 108           | 41   | 6    | 6   | 2                        | 1      | 1         |
| 53      | 1,87                        | 136 | 2         | 7         | 56          | 5        | 70            | 24   | 142    | 121           | 60   | 3    | 20  | 1                        | 2      | 1         |
| 54      | 2,74                        | 98  | 2         | 9         | 63          | 4        | 69            | 43   | 142    | 88            | 37   | 5    | 18  | 2                        | 1      | 1         |
| 55      | 5,5                         | 107 | 1         | 8         | 77          | 4        | 81            | 137  | 144    | 211           | 54   | 7    | 43  | 2                        | 1      | 1         |
| 56      | 2,29                        |     | 2         | 10        | 64          | 4        | 66            | 38   | 144    | 62            | 42   | 5    | 8   | 2                        | 1      | 1         |
| 57      | 1,38                        | 57  | 2         | 6         | 51          | 4        | 70            | 47   | 143    | 138           | 32   | 5    | 3   | 2                        | 1      | 1         |
| 58      | 2,56                        | 25  | 2         | 7         | 64          | 5        | 80            | 35   | 143    | 214           | 48   | 3    |     | 2                        | 1      | 1         |
| 59      | 1,26                        | 108 | 2         | 8         | 49          | 4        | 77            | 50   | 143    | 158           | 93   | 4    | 48  | 2                        | 1      | 1         |
| 60      | 2,67                        |     | 1         | 7         | 64          | 4        | 67            | 56   | 139    | 81            | 30   | 7    | 14  | 1                        | 2      | 1         |
| 61      | 1,12                        | 115 | 2         | 7         | 46          | 4        | 76            | 59   | 143    | 120           | 68   | 8    | 39  | 2                        | 1      | 1         |
| 62      | 2,33                        | 16  | 2         | 8         | 63          | 4        | 70            | 41   | 142    | 101           | 30   | 7    | 6   | 2                        | 1      | 1         |
| 63      | 1,87                        | 126 | 2         | 9         | 56          | 4        | 74            | 85   | 142    | 51            | 40   | 4    | 19  | 2                        | 1      | 1         |
| 64      | 1,93                        | 41  | 2         | 9         | 56          | 4        | 75            | 55   | 139    | 126           | 66   | 4    | 41  | 2                        | 1      | 2         |
| 65      | 1,5                         | 27  | 2         | 11        | 51          | 4        | 74            | 31   | 145    | 68            | 51   | 3    | 2   | 2                        | 1      | 2         |
| 66      | 1,35                        | 51  | 2         | 8         | 50          | 4        | 68            | 83   | 140    | 87            | 66   | 4    | 3   | 2                        | 2      | 2         |
| 67      | 1,43                        | 19  | 2         | 10        | 50          | 4        | 77            | 147  | 142    | 148           | 94   | 9    | 34  | 2                        | 1      | 2         |
| 68      | 5,57                        | 44  | 2         | 4         | 78          | 5        | 61            | 53   | 143    | 110           | 24   | 2    | 74  | 1                        | 2      | 2         |
| 69      | 0,87                        | 6   | 2         | 8         | 40          | 3        | 72            | 44   | 144    | 122           | 31   | 7    | 7   | 2                        | 1      | 2         |
| 70      | 2,56                        | 25  | 2         | 12        | 64          | 5        | 74            | 50   | 143    | 83            | 46   | 7    | 11  | 2                        | 1      | 2         |
| 71      | 1,77                        | 20  | 1         | 7         | 55          | 4        | 71            | 56   | 144    | 93            | 30   | 3    | 3   | 2                        | 1      | 2         |
| 72      | 1,59                        | 101 | 1         | 8         | 51          | 4        | 66            | 38   | 144    | 99            | 54   | 7    | 33  | 1                        | 2      | 2         |
| 73      | 1,36                        | 71  | 1         | 10        | 49          | 4        | 68            | 18   | 141    | 175           | 48   | 5    | 9   | 1                        |        | 2         |
| 74      | 2,65                        | 54  | 2         | 7         | 61          | 3        | 74            | 81   | 145    | 361           | 49   | 12   | 35  | 2                        | 1      | 2         |
| 75      | 2,11                        | 31  | 1         | 9         | 57          | 4        | 68            | 64   | 146    | 108           | 37   | 5    | 11  | 2                        | 1      | 2         |
| 76      | 1,39                        | 78  | 1         | 8         | 53          | 4        | 73            | 65   | 144    | 53            | 28   | 5    | 10  | 1                        | 2      | 2         |
| 77      | 2                           |     | 2         | 6         | 56          | 5        | 69            | 37   | 146    | 62            | 67   | 6    |     | 2                        | 2      | 2         |
| 78      | 1,62                        | 6   | 1         | 6         | 55          | 4        | 71            | 29   | 142    | 210           | 26   | 7    | 5   | 1                        | 2      | 2         |
| 79      | 1,49                        | 4   | 2         | 8         | 52          | 5        | 74            | 49   | 139    | 127           | 46   | 6    | 48  | 1                        | 1      | 2         |
| 80      | 2,42                        |     |           | 7         | 63          | 5        |               |      | 145    |               | 17   | 1    |     | 1                        | 1      | 2         |
| 81      | 2,78                        | 18  | 2         | 7         | 64          | 4        | 75            | 36   | 139    | 265           | 30   | 6    | 2   | 2                        | 2      | 2         |
| 82      | 2,07                        | 30  | 2         | 7         | 60          | 4        | 68            | 33   | 143    | 90            | 42   | 6    | 20  | 2                        | 1      | 2         |
| 83      | 5,2                         | 70  | 2         | 5         | 78          | 4        | 70            | 29   | 140    | 123           | 46   | 4    | 2   | 1                        | 2      | 2         |
| 84      | 3,23                        | 7   | 2         | 5         | 71          | 4        | 68            | 50   | 138    | 143           | 46   | 4    | 28  | 2                        | 1      | 2         |
| 85      | 3,29                        | 36  | 2         | 6         | 69          | 4        | 66            | 40   | 145    | 96            | 21   | 5    | 3   | 2                        | 1      | 2         |
| 86      | 2,3                         | 17  | 2         | 8         | 62          | 4        | 78            | 82   | 141    | 74            | 47   | 5    | 24  | 1                        | 2      | 2         |
| 87      | 1,41                        | 43  | 2         | 11        | 48          | 4        | 72            | 94   | 144    | 115           | 88   | 5    | 37  | 1                        | 2      | 2         |
| 88      | 2,03                        | 30  | 2         | 7         | 59          | 4        | 76            | 35   | 140    | 79            | 49   | 4    | 12  | 2                        | 1      | 2         |
| 89      | 1,62                        | 91  | 1         | 5         | 55          | 4        | 77            | 46   | 143    | 117           | 28   | 5    | 10  | 2                        | 1      | 2         |
| 90      | 9,22                        | 29  | 1         | 7         | 83          | 4        | 69            | 53   | 139    | 108           | 41   | 7    | 49  | 2                        | 2      | 2         |
| 91      | 2,03                        | 8   | 2         | 6         | 61          | 4        | 78            | 56   | 142    | 39            | 26   | 5    | 4   | 2                        | 1      | 2         |
| 92      | 2,64                        | 132 | 1         | 7         | 66          | 4        | 66            | 20   | 141    | 169           | 30   | 7    | 5   | 1                        | 2      | 2         |
| 93      | 2,7                         | 79  | 2         | 7         | 62          | 4        | 74            | 35   | 141    | 158           | 52   | 4    | 10  | 2                        | 1      | 2         |
| 94      | 6,58                        | 19  | 2         | 7         | 79          | 3        | 72            | 51   | 143    | 58            | 41   | 4    | 31  | 1                        | 2      | 2         |
| 95      | 2,11                        | 28  | 2         | 7         | 59          | 4        | 71            | 77   | 144    | 75            | 27   | 4    | 20  | 1                        | 2      | 2         |

# Dataset. Relationship between Urinary Level of Phytate and Valvular Calcification in an Elderly Population: a Cross-Sectional Study

| Subject | neutrophil_lymphocyte_ratio | LPA | Magnesium | Monocytes | Neutrophils | Potassium | Total protein | PTHi | Sodium | Triglycerides | Urea | Uric | VSG | MAC_1 |               | terciles_ |
|---------|-----------------------------|-----|-----------|-----------|-------------|-----------|---------------|------|--------|---------------|------|------|-----|-------|---------------|-----------|
|         |                             |     |           |           |             |           |               |      |        |               |      |      |     | 1yes_ | mod or mild_2 |           |
| 96      | 1,9                         | 59  | 1         | 8         | 57          | 4         | 73            | 30   | 138    | 120           | 41   | 5    | 12  | 1     | 1             | 2         |
| 97      | 4,06                        | 8   | 2         | 14        | 73          | 4         | 81            | 146  | 143    | 100           | 41   | 7    | 24  | 1     | 2             | 2         |
| 98      | 2,46                        | 112 | 1         | 7         | 59          | 4         | 70            | 69   | 137    | 75            | 52   | 8    | 4   | 2     | 2             | 2         |
| 99      | 12,57                       | 46  | 2         | 4         | 88          | 4         | 49            | 47   | 145    | 116           | 92   | 9    | 31  | 2     | 1             | 2         |
| 100     | 2,14                        | 7   | 1         | 7         | 62          | 4         | 71            | 41   | 142    | 167           | 54   | 5    | 2   | 2     | 1             | 2         |
| 101     | 2,56                        | 42  | 2         | 7         | 64          | 4         | 75            | 71   | 138    | 79            | 50   | 6    | 21  | 2     | 1             | 2         |
| 102     | 2,38                        | 6   | 1         | 7         | 62          | 4         | 74            | 84   | 143    | 111           | 42   | 7    | 2   | 1     | 1             | 2         |
| 103     | 1,59                        | 34  | 2         | 10        | 51          | 3         | 83            | 37   | 140    | 117           | 35   | 2    | 29  | 2     | 1             | 2         |
| 104     | 1,8                         | 17  | 2         | 10        | 54          | 4         | 71            | 30   | 134    | 321           | 75   | 10   | 70  | 1     | 1             | 2         |
| 105     | 2,44                        | 81  | 1         | 9         | 66          | 3         | 72            | 66   | 141    | 96            | 47   | 5    | 15  | 2     | 1             | 2         |
| 106     | 1,26                        | 30  | 2         | 5         | 48          | 4         | 81            | 24   | 143    | 448           | 39   | 12   | 33  | 1     | 2             | 2         |
| 107     | 1,88                        | 87  | 1         | 5         | 60          | 4         | 68            | 137  | 143    | 208           | 38   | 6    | 32  | 2     | 1             | 2         |
| 108     | 2,18                        | 81  | 1         | 11        | 61          | 3         | 70            | 22   | 140    | 119           | 53   | 6    | 10  | 2     | 1             | 2         |
| 109     | 1,4                         | 52  | 1         | 6         | 49          | 3         | 68            | 111  | 142    | 168           | 42   | 10   | 2   | 2     | 1             | 2         |
| 110     | 1,41                        | 38  | 1         | 8         | 52          | 4         | 69            | 32   | 145    | 46            | 32   | 4    | 11  | 1     | 2             | 2         |
| 111     | 4,69                        | 69  | 2         | 7         | 75          | 4         | 67            | 159  | 147    | 72            | 86   | 8    | 13  | 2     | 1             | 2         |
| 112     | 1,97                        | 26  | 2         | 6         | 59          | 4         | 74            | 91   | 143    | 106           | 36   | 6    | 2   | 2     | 1             | 2         |
| 113     | 2,21                        | 106 | 1         | 8         | 62          | 4         | 70            | 67   | 144    | 92            | 31   | 5    | 18  | 2     | 1             | 2         |
| 114     | 2,03                        | 121 | 1         | 8         | 59          | 4         | 75            | 22   | 143    | 66            | 26   | 5    | 4   | 2     | 2             | 2         |
| 115     | 1,38                        | 77  | 2         | 6         | 51          | 4         | 70            | 67   | 143    | 342           | 52   | 6    | 8   | 2     | 1             | 2         |
| 116     | 1,56                        | 35  | 2         | 8         | 53          | 4         | 71            | 73   | 143    | 159           | 36   | 4    | 10  | 2     | 1             | 2         |
| 117     | 5                           | 71  | 3         | 6         | 75          | 5         | 62            | 77   | 141    | 89            | 99   | 8    | 67  | 1     |               | 2         |
| 118     | 0,98                        |     | 2         | 8         | 44          | 4         | 72            | 51   | 139    | 97            | 52   | 6    | 15  | 1     | 1             | 2         |
| 119     | 2,14                        | 27  | 2         | 8         | 60          | 4         | 70            | 65   | 145    | 76            | 48   | 3    | 5   | 2     | 1             | 2         |
| 120     | 1,67                        | 51  | 1         | 8         | 55          | 4         | 75            | 46   | 142    | 116           | 41   | 5    | 15  | 2     | 1             | 2         |
| 121     | 1,58                        | 36  | 2         | 5         | 52          | 5         | 79            | 27   | 137    | 100           | 30   | 4    | 34  | 2     | 1             | 2         |
| 122     | 2,83                        | 18  | 1         | 8         | 68          | 4         | 74            | 55   | 141    | 129           | 39   | 4    | 16  | 1     | 2             | 2         |
| 123     | 1,89                        | 27  | 1         | 11        | 53          | 4         | 45            | 57   | 143    | 57            | 35   | 4    | 2   | 2     | 1             | 2         |
| 124     | 1,78                        | 9   | 1         | 8         | 57          | 4         | 73            | 21   | 141    | 299           | 45   | 5    | 30  | 2     | 1             | 2         |
| 125     | 2,91                        | 71  | 2         | 6         | 67          | 3         | 70            | 40   | 149    | 67            | 36   | 5    | 3   | 2     | 1             | 2         |
| 126     | 2,37                        | 8   | 2         | 5         | 64          | 4         | 73            | 80   | 142    | 132           | 22   | 3    | 14  | 1     | 2             | 3         |
| 127     | 1,96                        | 6   | 2         | 15        | 55          | 4         | 73            | 46   | 142    | 77            | 23   | 5    |     | 1     | 1             | 3         |
| 128     | 1,25                        | 13  | 2         | 8         | 50          | 4         | 62            | 86   | 144    | 109           | 31   | 6    | 1   | 2     | 1             | 3         |
| 129     | 2,67                        | 152 | 2         | 8         | 64          | 4         | 73            | 56   | 144    | 95            | 53   | 5    | 11  | 1     | 2             | 3         |
| 130     | 1,58                        | 6   | 2         | 9         | 52          | 3         | 74            | 65   | 145    | 82            | 31   | 5    | 15  | 2     | 1             | 3         |
| 131     | 3,29                        | 112 | 2         | 5         | 69          | 5         | 68            | 134  | 137    | 196           | 286  | 9    | 122 | 1     | 2             | 3         |
| 132     | 6,23                        | 11  | 2         | 6         | 81          | 4         | 75            | 24   | 141    | 50            | 30   | 7    | 4   | 2     | 2             | 3         |
| 133     | 1,02                        | 108 | 2         | 8         | 46          | 4         | 76            | 71   | 143    | 145           | 34   | 4    |     | 2     | 1             | 3         |
| 134     | 4,93                        | 96  | 2         | 7         | 74          | 4         | 67            | 75   | 145    | 126           | 49   | 7    | 30  | 1     | 2             | 3         |
| 135     | 2                           | 49  | 1         | 12        | 56          | 4         | 76            | 27   | 142    | 113           | 39   | 6    | 92  | 2     | 1             | 3         |
| 136     | 2,25                        | 25  | 1         | 7         | 63          | 4         | 72            | 31   | 143    | 224           | 24   | 6    | 8   | 2     | 1             | 3         |
| 137     | 1,7                         | 26  | 2         | 5         | 56          | 5         | 65            | 36   | 145    | 132           | 39   | 5    | 32  | 2     | 1             | 3         |
| 138     | 1,89                        | 149 | 1         | 5         | 53          | 4         | 63            | 25   | 144    | 71            | 47   | 5    | 28  | 2     | 1             | 3         |
| 139     | 1,34                        | 114 | 2         | 11        | 51          | 4         | 78            | 25   | 141    | 38            | 35   | 4    | 21  | 2     | 1             | 3         |
| 140     | 2,79                        |     | 2         | 6         | 67          | 4         | 65            | 51   | 140    |               | 37   | 5    | 34  | 2     | 2             | 3         |
| 141     | 2,68                        | 20  | 2         | 9         | 67          | 4         | 78            | 120  | 142    | 348           | 73   | 4    | 41  | 2     | 1             | 3         |
| 142     | 2,83                        | 187 | 2         | 4         | 65          | 4         | 73            | 55   | 138    | 75            | 92   | 11   | 42  | 1     | 1             | 3         |
| 143     | 1,21                        | 52  | 1         | 10        | 46          | 4         | 64            | 28   | 136    | 76            | 61   | 6    | 2   | 2     | 2             | 3         |
| 144     | 1,93                        | 6   | 1         | 8         | 58          | 4         | 72            | 54   | 143    | 105           | 30   | 3    | 8   | 2     | 1             | 3         |
| 145     | 1,66                        | 58  | 1         | 10        | 53          | 4         | 82            | 35   | 141    | 140           | 39   | 4    | 13  | 2     | 1             | 3         |
| 146     | 3,19                        | 11  | 2         | 10        | 67          | 4         | 69            | 67   | 144    | 71            | 50   | 5    | 12  | 2     | 1             | 3         |
| 147     | 1,81                        | 24  | 2         | 8         | 56          | 4         | 65            | 105  | 143    | 132           | 47   | 4    | 11  | 2     | 1             | 3         |
| 148     | 3,09                        | 145 | 1         | 8         | 68          | 4         | 71            | 67   | 146    | 164           | 68   | 7    |     | 1     | 2             | 3         |
| 149     | 0,91                        | 40  | 1         | 6         | 42          | 4         | 74            | 66   | 143    | 109           | 49   | 5    | 9   | 2     | 1             | 3         |
| 150     | 1,68                        | 13  | 2         | 6         | 57          | 3         | 73            | 76   | 141    | 98            | 40   | 4    | 1   | 1     | 1             | 3         |
| 151     | 1,78                        | 66  | 1         | 7         | 57          | 4         | 70            | 17   | 144    | 204           | 45   | 6    | 14  | 1     | 1             | 3         |
| 152     | 1,88                        | 37  | 2         | 10        | 60          | 4         | 78            | 77   | 140    | 80            | 45   | 6    | 15  | 1     | 2             | 3         |
| 153     | 0,41                        | 6   | 1         | 6         | 7           |           | 79            | 56   | 141    | 223           | 34   | 6    |     | 2     | 1             | 3         |
| 154     | 1,71                        | 6   | 2         | 8         | 53          | 5         | 66            | 82   | 144    | 85            | 18   | 2    | 17  | 2     | 1             | 3         |
| 155     | 1,78                        | 20  | 2         | 7         | 57          | 4         | 74            | 28   | 141    | 152           | 37   | 4    |     | 2     | 1             | 3         |
| 156     | 2,86                        | 62  | 2         | 9         | 63          | 4         | 62            | 26   | 139    | 167           | 33   | 6    | 77  | 2     | 2             | 3         |
| 157     | 1,81                        | 27  | 2         | 6         | 58          | 4         | 69            | 45   | 138    | 85            | 40   | 4    | 5   | 2     | 1             | 3         |
| 158     | 2,19                        | 29  | 2         | 10        | 59          | 4         | 72            | 36   | 142    | 105           | 26   | 6    | 3   | 2     | 1             | 3         |
| 159     | 3,79                        | 45  | 2         | 7         | 72          | 4         | 73            | 61   | 145    | 64            | 28   | 5    | 23  | 1     | 1             | 3         |
| 160     | 1,2                         | 109 | 2         | 6         | 49          | 4         | 79            | 24   | 141    | 138           | 50   | 9    | 32  | 2     | 2             | 3         |
| 161     | 1,12                        | 72  | 1         | 10        | 46          | 4         | 70            | 32   | 144    | 56            | 33   | 5    | 2   | 2     | 1             | 3         |
| 162     | 1,97                        | 10  | 1         | 7         | 59          | 4         | 68            | 26   | 140    | 81            | 45   | 4    | 5   | 2     | 2             | 3         |
| 163     | 2,78                        | 13  | 2         | 9         | 64          | 4         | 70            | 45   | 138    | 223           | 23   | 9    | 1   | 2     | 2             | 3         |
| 164     | 2,15                        | 32  | 1         | 7         | 58          | 4         | 71            | 54   | 141    | 79            | 34   | 5    | 40  | 2     | 1             | 3         |
| 165     | 1,9                         | 24  | 2         | 7         | 57          | 3         | 76            | 23   | 145    | 87            | 33   | 5    | 4   | 2     | 1             | 3         |
| 166     | 2,76                        | 16  | 1         | 4         | 69          | 4         | 75            | 133  | 145    | 167           | 17   | 6    | 2   | 2     | 1             | 3         |
| 167     | 1,9                         | 6   | 2         | 7         | 59          | 4         | 70            | 33   | 141    | 110           | 46   | 5    | 2   | 2     | 1             | 3         |
| 168     | 1,42                        | 77  | 1         | 9         | 51          | 4         | 76            | 40   | 144    | 217           | 35   | 5    | 6   | 2     | 1             | 3         |
| 169     | 5                           | 45  | 1         | 6         | 75          | 4         | 64            | 72   | 139    | 152           | 73   | 8    | 26  | 1     | 2             | 3         |
| 170     | 0,85                        | 37  | 2         | 6         | 41          | 4         | 74            | 61   | 145    | 118           | 35   | 4    |     | 2     | 1             | 3         |
| 171     | 1,81                        | 174 | 1         | 7         | 58          | 4         | 74            | 42   | 143    | 227           | 49   | 5    | 14  | 2     | 1             | 3         |
| 172     | 1,26                        | 15  | 2         | 7         | 49          | 3         | 71            | 54   | 148    | 47            | 38   | 4    | 10  | 1     | 1             | 3         |
| 173     | 0,52                        | 33  | 1         | 5         | 31          | 4         | 75            | 32   | 142    | 133           | 37   | 3    | 11  | 2     | 1             | 3         |
| 174     | 1,93                        | 18  | 2         | 9         | 58          | 4         | 74            | 84   | 140    | 67            | 40   | 3    | 20  | 2     | 2             | 3         |
| 175     | 1,65                        | 34  | 2         | 7         | 56          | 4         | 67            | 31   | 141    | 183           | 37   | 4    | 6   | 2     | 1             | 3         |
| 176     | 2,64                        | 22  | 1         | 7         | 66          | 4         | 70            | 19   | 140    | 125           | 77   | 5    | 11  | 2     | 2             | 3         |
| 177     | 2,4                         | 18  | 1         | 8         | 60          | 4         | 72            | 40   | 142    | 252           | 51   | 9    | 7   | 1     | 2             | 3         |
| 178     | 4,73                        | 50  | 2         | 9         | 71          | 6         | 69            | 207  | 137    | 161           | 176  | 6    | 87  | 2     | 1             | 3         |
| 179     | 1,64                        |     |           | 8         | 54          | 4         |               |      | 143    |               |      |      | 12  | 2     | 1             | 3         |
| 180     | 1,42                        | 79  | 2         | 6         | 54          | 4         | 72            | 44   | 142    | 181           | 49   | 8    | 15  | 2     | 1             | 3         |
| 181     | 15,8                        | 105 | 2         | 13        | 79          |           | 63            | 54   | 132    | 74            | 23   | 5    | 71  | 2     | 2             | 3         |
| 182     | 3,24                        | 32  | 2         | 7         | 68          |           | 76            | 19   | 133    | 181           | 41   | 6    | 128 | 2     | 1             | 3         |
| 183     | 2,3                         | 19  | 2         | 8         | 62          | 4         | 73            | 32   | 140    | 102           | 60   | 7    |     | 1     | 1             | 3         |
| 184     | 2,88                        | 12  | 2         | 5         | 69          | 4         | 67            | 144  | 142    | 127           | 34   | 5    | 18  | 2     | 1             | 3         |
| 185     | 1,81                        | 20  | 2         | 7         | 58          | 4         | 76            | 64   | 141    | 111           | 39   | 5    | 25  | 2     | 1             | 3         |
| 186     | 1,97                        | 60  | 2         | 8         | 59          | 4         | 72            | 55   | 138    | 147           | 69   | 7    | 15  | 2     | 1             | 3         |
| 187     | 1,77                        | 85  | 2         | 8         | 55          | 4         | 78            | 21   | 140    | 74            | 32   | 6    | 5   | 2     | 1             | 3         |
| 188     | 1,83                        | 22  | 2         | 8         | 55          | 4         | 73            | 60   | 142    | 303           | 39   | 6    | 15  | 2     | 1             | 3         |
